# Supplementary material
Source: publisher figshare collection journal article supplement (https://future-science-group.figshare.com/ndownloader/files/28924800)
Supplement: Supplementary file 1 [file 28924800]

**Table S1** The statistical difference of 28 miRNAs between 5 IDC pools and 3 HCs pools at the screening cohort

| **ID** | **logFC** | **AveExpr** | **t** | **P.Value** | **adj.P.Val** | **B** |
| --- | --- | --- | --- | --- | --- | --- |
| **hsa-miR-125b-5p** | 2.36218 | 1.47636 | 28.95529 | 1.10E-09 | 1.73E-08 | 13.09535 |
| **hsa-miR-196b-5p** | 2.04147 | 1.27592 | 27.05125 | 1.94E-09 | 1.81E-08 | 12.50886 |
| **hsa-miR-129-3p** | 1.89169 | 1.18231 | 15.93591 | 1.50E-07 | 5.24E-07 | 7.85327 |
| **hsa-miR-20a-5p** | 1.81011 | 1.13132 | 19.74955 | 2.60E-08 | 1.21E-07 | 9.75189 |
| **hsa-miR-9-5p** | 1.68318 | 1.05199 | 14.16051 | 3.89E-07 | 1.09E-06 | 6.80983 |
| hsa-miR-642b-3p | 1.08187 | 0.71892 | 11.87639 | 1.43E-06 | 3.01E-06 | 5.33862 |
| hsa-miR-224-5p | 0.93722 | 0.58576 | 3.94433 | 0.003909 | 0.004975 | -3.25570 |
| hsa-miR-96-5p | 0.79281 | 0.49276 | 5.32891 | 0.000584 | 0.001193 | -1.01982 |
| hsa-miR-652-3p | 0.70813 | 0.44891 | 2.62981 | 0.028912 | 0.026193 | -4.29812 |
| hsa-miR-194-5p | 0.64193 | 0.44398 | 2.87391 | 0.020874 | 0.018591 | -3.90578 |
| hsa-miR-409-3p | 0.62891 | 0.37915 | 5.00192 | 0.001871 | 0.003988 | -2.49880 |
| hsa-miR-148b-3p | 0.59978 | 0.37481 | 4.18912 | 0.001092 | 0.003502 | -3.19871 |
| hsa-miR-1225-5p | 0.55289 | 0.34643 | 3.67375 | 0.005995 | 0.006793 | -3.34912 |
| hsa-miR-505-5p | 0.51398 | 0.31962 | 5.33783 | 0.002891 | 0.004762 | 2.33788 |
| hsa-miR-376c-3p | 0.46491 | 0.28923 | 2.70892 | 0.027789 | 0.030112 | -4.01892 |
| hsa-miR-127-3p | 0.44381 | 0.26026 | 6.11896 | 7.34E-05 | 0.000298 | 2.39811 |
| hsa-miR-100-5p | -0.51560 | -0.32225 | -4.64233 | 0.001476 | 0.002175 | -2.21150 |
| hsa-miR-1207-5p | -0.90938 | -0.52890 | -4.69344 | 0.001996 | 0.003762 | -2.18412 |
| hsa-miR-139-5p | -0.94680 | -0.59043 | -4.61931 | 0.001482 | 0.002175 | -2.87441 |
| hsa-miR-411-5p | -1.16901 | -0.72804 | -3.46712 | 0.003672 | 0.006027 | -3.89120 |
| hsa-miR-382-5p | -1.27781 | -0.79193 | -3.33765 | 0.005392 | 0.008087 | -2.97243 |
| hsa-miR-6875-5p | -1.30892 | -0.84336 | -12.18931 | 1.79E-07 | 5.86E-07 | 6.98023 |
| **hsa-miR-1-3p** | -1.55224 | -0.97015 | -11.44477 | 2.13E-06 | 4.60E-06 | 4.94458 |
| **hsa-miR-145-5p** | -1.85031 | -1.15644 | -13.27450 | 6.55E-07 | 1.67E-06 | 6.24109 |
| **hsa-miR-146a-5p** | -2.09184 | -1.30740 | -15.21727 | 2.18E-07 | 6.77E-07 | 7.44521 |
| **hsa-miR-34a-5p** | -2.15538 | -1.34711 | -21.52021 | 1.28E-08 | 8.97E-08 | 10.50946 |
| **hsa-miR-34b-3p** | -2.15631 | -1.34769 | -20.64726 | 1.80E-08 | 1.01E-07 | 10.14441 |
| **hsa-miR-143-3p** | -3.16100 | -1.97563 | -28.55753 | 1.24E-09 | 1.73E-08 | 12.97647 |
